# Supplementary material for: Ferrostatin-1 inhibits fibroblast fibrosis in keloid by inhibiting ferroptosis
Source: PeerJ. 2024 Jun 14;12:e17551. doi: 10.7717/peerj.17551 (PMC11182022; doi:10.7717/peerj.17551)
Supplement: Data S1 [file peerj-12-17551-s002.xlsx]

## Sheet: Sheet1
1A
Normal	3.13	4.78	3.46	2.05	3.93	2.81	2.61	3.12	2.84	1.62	1.79	3.88	3.03	4.5	6.19	1.55	3.34	1.86	2.7	3.12	5.57	2.93	3.65	1.75	2.05	4.35	1.64	4.73	2.37	2.54	2.8	3.29	2.52	3.09	2.46	1.77	5.57	3.11	3.12	2.99
Keloid	6.2	10.31	8.86	5.65	8.55	8.07	3.47	8.79	5.34	8.3	6.94	6.9	6.5	9.12	8.55	8.7	9.99	6.76	8.3	8.36	7.81	7.67	6.76	9.06	8.04	9.99	8.12	8.56	5.99	8.95	5.42	5.95	8.28	6.43	8.72	7.67	9.12	2.69	9.56	7.73	6.49	7.69	9.64	4.84	5.93	11.83	7.39	6.64	8.42
1B-1E
SLC7A11
Normal	1.02	0.84	0.99	1.11	0.94	0.92	1.06	0.96	1.02	1.06	0.94	0.82	1.12	0.85	0.92	0.59	1.42	1.31	1.06	0.96	1.24	1.18	0.84	1.59	1.11	0.93	0.93	1.08	0.77	1.12	0.42	0.91	0.94	1.01	0.9	1.14	1.09	1.08	0.83	0.94
Keloid	0.27	0.2	0.26	0.37	0.42	0.29	0.35	0.33	0.5	0.38	0.23	0.11	0.47	0.25	0.37	0.44	0.45	0.33	0.1	0.19	0.3	0.35	0.25	0.27	0.51	0.47	0.37	0.24	0.26	0.28	0.27	0.42	0.21	0.48	0.27	0.3	0.39	0.22	0.25	0.29	0.27	0.23	0.55	0.35	0.3	0.47	0.42	0.32	0.32
GPX4
Normal	0.86	1.13	0.92	1.5	0.95	0.91	1.12	0.73	0.76	1.16	0.88	0.82	1.29	1.2	0.92	0.89	0.94	1.07	1.28	0.92	0.76	0.96	1.1	1.38	1.28	0.86	1.03	0.73	0.64	1.18	0.77	0.54	1.07	1.22	0.74	1.15	1	1.26	1.1	0.98
Keloid	0.4	0.48	0.49	0.45	0.4	0.29	0.47	0.45	0.49	0.33	0.44	0.33	0.44	0.43	0.53	0.37	0.36	0.45	0.3	0.54	0.45	0.34	0.55	0.35	0.62	0.51	0.49	0.33	0.38	0.47	0.54	0.42	0.35	0.41	0.38	0.21	0.35	0.26	0.31	0.24	0.47	0.6	0.41	0.51	0.36	0.44	0.3	0.32	0.49
TFRC
Normal	0.94	0.91	1.07	0.77	1.28	0.57	0.94	0.86	0.82	0.91	1.42	1.16	1.46	0.83	1.9	0.8	0.94	0.62	1.21	1.13	0.65	1.43	1.15	1	0.98	0.88	1.42	0.88	0.75	1.19	1.23	0.89	0.83	0.85	0.94	0.94	1.09	1.21	0.41	0.76
Keloid	2.26	2.94	2.58	2.85	2.53	3.11	3.07	2.64	3	2.48	2.87	2.55	2.94	2.75	2.66	2.8	2.67	3.1	2.66	2.84	3.09	2.56	2.56	3.01	2.42	3.09	3.01	3.79	2.05	3.14	3.22	2.62	2.03	2.32	2.4	3.01	2.51	2.91	2.53	3.04	2.79	3.04	2.55	2.69	2.63	2.41	2.76	3.1	2.82
Nrf2
Normal	1.21	0.88	0.95	1.15	1.02	0.9	1.12	1.08	1.1	0.73	1.18	0.93	1.15	0.97	1.06	1	0.78	0.73	1.27	0.9	0.97	1.13	0.97	1.22	0.96	1.08	0.96	1.05	1.09	0.77	0.84	1.24	0.79	0.94	0.98	0.77	0.98	1	1.15	1
Keloid	0.37	0.39	0.44	0.39	0.53	0.4	0.38	0.31	0.43	0.47	0.33	0.25	0.34	0.42	0.28	0.26	0.43	0.5	0.4	0.34	0.4	0.21	0.45	0.37	0.29	0.48	0.45	0.3	0.44	0.3	0.36	0.44	0.54	0.38	0.31	0.39	0.29	0.39	0.43	0.25	0.49	0.44	0.4	0.39	0.45	0.55	0.43	0.47	0.39
1G-1J
SLC7A11
Normal	1.08	0.88	1.21	1	1.06	1.23	1	1.15	0.94	0.73	1.16	1.14	0.81	0.95	1.05	0.6	1.22	0.8	0.91	0.99	1.03	1.09	0.81	0.9	1.07	1.37	0.81	1.07	1.09	1.1	0.92	1.34	1.12	1.06	0.92	0.92	0.83	1.06	0.77	0.81
Keloid	0.36	0.4	0.39	0.17	0.26	0.39	0.43	0.47	0.44	0.49	0.37	0.26	0.2	0.46	0.29	0.35	0.37	0.21	0.58	0.5	0.43	0.3	0.38	0.47	0.59	0.73	0.46	0.35	0.38	0.5	0.7	0.23	0.32	0.26	0.31	0.38	0.24	0.63	0.29	0.18	0.28	0.46	0.43	0.34	0.42	0.37	0.41	0.3	0.35
GPX4
Normal	1.09	1.2	1.24	1.03	0.97	1.01	1.17	1.05	0.96	0.6	1.02	0.89	1.16	1.06	1.24	0.97	0.99	1.16	1.28	1	1.3	1.15	0.69	0.88	1.26	0.85	0.93	1.08	0.9	1	0.64	1.01	1.17	1.08	0.72	0.88	0.86	0.94	0.8	0.77
Keloid	0.5	0.6	0.3	0.51	0.64	0.26	0.39	0.54	0.53	0.58	0.27	0.16	0.38	0.69	0.42	0.38	0.42	0.28	0.41	0.56	0.68	0.55	0.29	0.37	0.46	0.36	0.54	0.3	0.71	0.25	0.83	0.2	0.49	0.25	0.51	0.29	0.39	0.3	0.49	0.53	0.31	0.45	0.24	0.54	0.43	0.55	0.53	0.45	0.61
TFRC
Normal	1.11	0.86	0.99	1.04	0.94	1.06	0.94	0.87	0.95	0.9	1	1.15	0.85	1.06	1	1.08	1.06	0.93	0.98	1.08	0.86	1.05	1.02	0.81	0.92	0.96	0.98	0.89	0.95	1.05	0.99	0.92	0.85	0.88	1.12	1.25	0.96	1.32	1.1	1.29
Keloid	2.51	2.07	2.52	1.99	2.11	2.41	2	2.46	2.19	1.93	2.24	2.38	1.97	2.63	2.16	1.85	2.5	2.7	2.29	1.8	2.14	2.11	2.4	1.91	2.45	2.28	2.75	2.62	2.41	2.63	1.97	2.15	2.19	2.75	2.55	2.48	2.33	2.36	2.44	1.93	2.09	2.22	2.56	2.14	2.5	2.23	1.71	2.24	2.47
Nrf2
Normal	1.07	1.05	1.02	1.01	1.03	0.98	0.89	0.91	1.01	1.07	1.02	1.06	1.03	1.04	1.03	0.83	0.91	1.01	0.96	1.04	0.98	1.02	0.94	1.07	0.97	0.98	1	1.03	1.07	1.03	0.99	0.93	1.1	1.14	0.9	1.07	1.02	0.91	0.88	1
Keloid	0.33	0.29	0.31	0.17	0.38	0.21	0.3	0.28	0.31	0.33	0.22	0.32	0.28	0.37	0.28	0.34	0.35	0.31	0.34	0.24	0.23	0.32	0.2	0.34	0.29	0.35	0.26	0.31	0.27	0.36	0.17	0.22	0.27	0.31	0.29	0.39	0.34	0.33	0.4	0.45	0.38	0.23	0.4	0.33	0.14	0.31	0.21	0.23	0.33
1K
LPO
Normal	1.03	1.17	1.06	0.92	0.98	0.83	0.88	0.9	1.09	0.8	0.69	1.09	0.91	1.04	0.9	1.03	1.02	0.82	1.14	0.75	0.98	1.18	1.1	0.99	1.23	1.01	1.04	1	0.87	1.35	0.98	1.18	0.92	0.76	0.79	1.26	0.95	1.3	1	0.85
Keloid	2.85	2.81	3.1	2.58	2.71	2.54	2.61	2.74	2.58	2.48	2.6	2.88	2.66	2.98	2.73	2.67	2.63	2.8	2.67	3.05	2.56	2.86	3.25	2.83	2.66	2.39	2.6	2.52	2.95	2.88	2.71	3.01	2.9	2.79	2.73	2.82	2.58	2.64	2.93	2.57	2.62	2.78	2.82	3.04	2.63	2.68	2.56	2.94	2.63
2A
	NFs							KFs
	3.32	2.51	3.13	6.29	3.58	5.87		9.98	5.97	11.4	8.32	9.41	11.36
2B-2E
	NFs							KFs
SLC7A11	1.06	0.98	0.94	1.03	1	0.99		0.43	0.29	0.27	0.44	0.34	0.44
GPX4	1	0.97	0.94	1.06	1.07	0.95		0.37	0.35	0.39	0.49	0.42	0.59
TFRC	0.96	1	1.1	0.93	0.96	1..05		2.1	2.65	2.59	2.61	2.64	2.7
Nrf2	1.02	0.96	1	1.15	0.95	1.03		0.3	0.33	0.44	0.37	0.4	0.41
2G-2J
	NFs							KFs
SLC7A11	1.05	1	0.93	1.05	0.96	1.01		0.43	0.29	0.27	0.44	0.34	0.44
GPX4	1.15	0.98	0.86	1.01	0.95	1.05		0.37	0.35	0.39	0.49	0.42	0.59
TFRC	1.01	1.04	0.93	1.03	1.03	0.96		2.1	2.65	2.59	2.61	2.64	2.7
Nrf2	1.03	0.96	0.93	0.97	1.05	1.07		0.3	0.33	0.44	0.37	0.4	0.41
2L
	NFs							KFs
LPO	1.06	1.08	0.97	0.96	0.88	1.02		2.41	2.56	2.31	2.62	2.7	2.46
3A
	Fer-1 0 μM							Fer-1 0.5 μM							Fer-1 1 μM							Fer-1 5 μM							Fer-1 10 μM							Fer-1 20 μM
	104.2	101.7	94.2	95.4	92.6	108.9		99.4	100.1	96	101.3	104.8	89.8		99.4	102.4	87.3	98.3	89.3	95.3		98.7	94.2	87.7	89.1	99.2	91.8		75.8	86.1	88	81.3	76.2	85.5		65.9	67.6	60.2	57.5	58.4	65.8
3B
	Control							Fer-1 1 μM							Fer-1 5 μM
	9.55	11.01	6.92	11.59	10.77	7.36		6.98	5.94	9.01	6.81	7.98	4.16		4.52	3.8	2.48	4.71	6.17	5.11
3D-3E
	Control							Fer-1 1 μM							Fer-1 5 μM
SLC7A11	1.06	1.04	0.93	1.1	0.91	0.97		1.66	1.6	1.77	1.72	1.57	1.59		2.45	2.68	2.77	2.81	2.62	2.48
GPX4	0.9	1.04	1	1.08	1.05	0.98		1.51	1.53	1.47	1.5	1.55	1.72		2.27	2.35	2.05	2.27	2.36	2.34
3F-3G
	Control							Fer-1 1 μM							Fer-1 5 μM
TFRC	0.93	1.04	0.89	1.11	1.05	1.07		0.72	0.63	0.69	0.71	0.65	0.54		0.42	0.35	0.39	0.35	0.39	0.29
Nrf2	1.06	0.95	0.91	1.02	1.04	0.99		1.68	1.56	1.58	1.76	1.56	1.54		2.55	2.58	2.15	2.44	2.47	2.42
3H
	Control							Fer-1 1 μM							Fer-1 5 μM
	30.2	36.3	25.4	29.5	32.5	34.2		20.6	22.5	21.2	18.9	27.1	24.5		12.1	14.1	11.9	12.7	16	9.7
3J
	Control							Fer-1 1 μM							Fer-1 5 μM
	8.6	9.4	7.1	10.5	8.1	8.7		6.2	4.9	6.1	7.2	6.4	6.2		3.9	4.8	3.1	4.3	3.9	4.7
3L
	Control							Fer-1 1 μM							Fer-1 5 μM
LPO	0.94	0.87	1.05	1.01	0.98	1.12		0.67	0.54	0.72	0.7	0.65	0.83		0.45	0.4	0.33	0.51	0.42	0.72
3M
	Control							Fer-1 1 μM							Fer-1 5 μM
	23.5	24.1	30	26.4	28.2	32.5		29.3	32.9	34.8	42.4	35.1	36.3		52.1	45.4	50.1	43	56.8	53.4
3N
	Control							Fer-1 1 μM							Fer-1 5 μM
	98	95	111	96	100	97		247	279	232	283	235	240		430	414	487	428	397	385
3O
	Control							Fer-1 1 μM							Fer-1 5 μM
	92.6	97.2	102.8	107.5	104.7	98.2		171.1	192.9	182.4	168.7	181.7	173.3		271	245.5	276.7	293.8	253.4	255.7
4B-4D
	Control							Fer-1 1 μM							Fer-1 5 μM
α-SMA	1.01	1.03	1.09	0.97	0.86	1		0.67	0.63	0.69	0.71	0.65	0.54		0.53	0.36	0.39	0.46	0.5	0.47
collagen I	0.91	0.99	1.04	1.03	1.02	1.03		0.54	0.65	0.62	0.51	0.63	0.54		0.4	0.35	0.39	0.35	0.44	0.44
collagen III	0.96	1.1	1.06	0.93	0.91	1.02		0.61	0.56	0.49	0.59	0.58	0.62		0.37	0.31	0.27	0.3	0.28	0.31
4H
	Control							Fer-1 1 μM							Fer-1 5 μM
α-SMA	102	108.2	99.1	99.2	105.1	89.4		78.8	70.3	77.9	70.5	65.5	69.8		51.8	60.1	49.7	51.8	45.9	51.7
collagen I	106.1	91.9	108.5	94	92.5	104.1		69.6	62.4	56.6	64.3	50.8	57.2		31.4	39.3	31.5	42	30.3	32.7
collagen III	92.7	103.2	103.9	96.2	91.9	105		60.1	62.1	63	54.5	72.2	62.4		40.8	43.8	44.9	52.6	38.1	42.3
5A
	Erastin 0 μM							Erastin 0.5 μM							Erastin 1 μM							Erastin 5 μM							Erastin 10 μM							Erastin 20 μM
	94.7	100.6	109.3	108	100.2	90.4		96.9	95.7	90.2	105.9	97.6	99.6		93.4	95.6	99.4	98.5	109.7	93		87.8	97	93.3	95.3	96.1	99.1		90.4	98.1	86.7	89.6	92.1	98.6		82.7	77.7	81.4	86.1	72.3	83
5B
	Control							Erastin 5 μM							Erastin 10 μM
	9.62	11.53	9.17	10.49	8.38	5.8		10.8	15.3	14.05	17.94	13.17	15.89		23.32	20.02	23.07	19.06	22.65	15.27
5D-5E
	Control							Erastin 5 μM							Erastin 10 μM
SLC7A11	1.06	1.04	0.93	1.1	0.91	0.97		0.7	0.55	0.66	0.65	0.63	0.74		0.43	0.37	0.29	0.37	0.45	0.31
GPX4	0.9	1.04	1	1.08	1.05	0.98		0.52	0.58	0.72	0.56	0.62	0.57		0.3	0.27	0.36	0.28	0.38	0.34
5F-5G
	Control							Erastin 5 μM							Erastin 10 μM
TFRC	0.98	1.01	0.99	0.98	1	1.04		1.85	1.71	1.73	1.82	1.88	1.65		2.33	2.26	2.34	2.23	2.41	2.26
Nrf2	1	1.04	1.04	0.98	0.94	1.01		0.69	0.65	0.59	0.57	0.6	0.66		0.43	0.41	0.33	0.35	0.4	0.42
5H
	Control							Erastin 5 μM							Erastin 10 μM
	28.7	30.3	36.7	25.9	30.1	30.3		50.6	45.6	50	39.9	48.9	50.3		63.7	69.3	27.9	70.5	58.4	68
5J
	Control							Erastin 5 μM							Erastin 10 μM
	8.5	8.9	9.4	7.9	5.8	9.5		11.7	12.8	13.2	13.5	17.2	12.4		15.3	19.9	19.7	22.6	21.2	22.1
5L
	Control							Erastin 5 μM							Erastin 10 μM
LPO	0.91	0.97	1.04	1.16	1.03	0.97		1.74	1.89	1.63	1.68	1.7	1.96		2.1	2.34	2.22	2.46	2.28	2.55
5M	Control							Erastin 5 μM							Erastin 10 μM
	27.4	30.1	33.9	25.4	29.3	25.2		21	19.1	17.5	18	16	22.8		12	12.8	10.6	12.6	8.6	12.7
5N
	Control							Erastin 5 μM							Erastin 10 μM
	98.2	102.9	104.2	92.5	107.8	97.4		52.1	49.2	60.3	50	57.3	49.5		26.8	23.7	24.6	30.3	20.5	21.9
5O
	Control							Erastin 5 μM							Erastin 10 μM
	104.8	1.9.5	96.9	94.5	99.9	97.4		61.6	69	66	61.4	70.8	69.9		39.1	45.4	41	47.7	47.5	41.3
6B-6D
	Control							Erastin 5 μM							Erastin 10 μM
α-SMA	1.07	0.92	0.97	1.1	0.95	0.97		1.85	1.82	2.12	1.95	2.03	1.97		2.75	2.92	2.73	2.58	2.78	2.95
collagen I	1	0.96	1.05	0.91	1.03	1.05		2.13	1.97	2.15	2.08	1.82	2.16		3.2	3.28	3.17	2.79	3	3.08
collagen III	1.03	1.02	0.97	1.05	0.98	0.91		1.75	1.7	1.84	1.72	1.8	1.79		2.4	2.58	2.36	2.76	2.6	2.58
6H
	Control							Erastin 5 μM							Erastin 10 μM
α-SMA	100	105	89	96	109	98		178	200	175	192	177	174		275	247	243	249	248	270
collagen I	94	100	109	105	85	104		192	179	201	208	188	217		308	291	335	309	327	310
collagen III	100	102	90	101	110	100		162	171	179	152	170	170		227	253	238	256	233	230
[truncated: 21 more columns]
