# Supplementary material for: Ferrostatin-1 inhibits fibroblast fibrosis in keloid by inhibiting ferroptosis
Source: PeerJ. 2024 Jun 14;12:e17551. doi: 10.7717/peerj.17551 (PMC11182022; doi:10.7717/peerj.17551)
Supplement: Supplemental Information 3 [file peerj-12-17551-s003.xls]

## Sheet: Sheet1
ITEM TO CHECK	IMPORTANCE	CHECKLIST
EXPERIMENTAL DESIGN
Definition of experimental and control groups	E	line 73-74 81-84
Number within each group	E	line 73-74 81-84
Assay carried out by core lab or investigator's lab?	D	investigator's lab
Acknowledgement of authors' contributions	D
SAMPLE
Description	E	line 72-87
Volume/mass of sample processed	D	line 72-87
Microdissection or macrodissection	E	line 72-87
Processing procedure	E	line 72-87
If frozen - how and how quickly?	E	line 72-87
If fixed - with what, how quickly?	E	line 72-87
Sample storage conditions and duration (especially for FFPE samples)	E	line 72-87
NUCLEIC ACID EXTRACTION
Procedure and/or instrumentation	E	line 97
Name of kit and details of any modifications	E	line 97
Source of additional reagents used	D	line 98
Details of DNase or RNAse treatment	E	line 98
Contamination assessment (DNA or RNA)	E	line 98-99
Nucleic acid quantification	E	line 98-104
Instrument and method	E	line 98-104
Purity (A260/A280)	D	line 98-104
Yield	D	line 98-104
RNA integrity method/instrument	E	line 98-104
RIN/RQI or Cq of 3' and 5' transcripts	E	Not Applicable
Electrophoresis traces	D
Inhibition testing (Cq dilutions, spike or other)	E	line 98-104
REVERSE TRANSCRIPTION
Complete reaction conditions	E	line 98-104
Amount of RNA and reaction volume	E	line 98-104
Priming oligonucleotide (if using GSP) and concentration	E	line 98-104
Reverse transcriptase and concentration	E	line 98-104
Temperature and time	E	line 98-104
Manufacturer of reagents and catalogue numbers	D	line 98-104
Cqs with and without RT	D*
Storage conditions of cDNA	D
qPCR TARGET INFORMATION
If multiplex, efficiency and LOD of each assay.	E	No applicable.
Sequence accession number	E	No applicable.
Location of amplicon	D
Amplicon length	E	No applicable.
In silico specificity screen (BLAST, etc)	E	No applicable.
Pseudogenes, retropseudogenes or other homologs?	D
Sequence alignment	D
Secondary structure analysis of amplicon	D
Location of each primer by exon or intron (if applicable)	E	No applicable.
What splice variants are targeted?	E	No applicable.
qPCR OLIGONUCLEOTIDES
Primer sequences	E	line 98-104
RTPrimerDB Identification Number	D
Probe sequences	D**
Location and identity of any modifications	E	No modifications
Manufacturer of oligonucleotides	D	line 98-104
Purification method	D	line 98-104
qPCR PROTOCOL
Complete reaction conditions	E	line 98-104
Reaction volume and amount of cDNA/DNA	E	line 98-104
Primer, (probe), Mg++ and dNTP concentrations	E	line 98-104
Polymerase identity and concentration	E	line 98-104
Buffer/kit identity and manufacturer	E	line 98-104
Exact chemical constitution of the buffer	D
Additives (SYBR Green I, DMSO, etc.)	E	line 98-104
Manufacturer of plates/tubes and catalog number	D	line 98-104
Complete thermocycling parameters	E	line 98-104
Reaction setup (manual/robotic)	D	line 98-104
Manufacturer of qPCR instrument	E	line 98-104
qPCR VALIDATION
Evidence of optimisation (from gradients)	D
Specificity (gel, sequence, melt, or digest)	E	line 98-104
For SYBR Green I, Cq of the NTC	E	line 98-104
Standard curves with slope and y-intercept	E	line 98-104
PCR efficiency calculated from slope	E	line 98-104
Confidence interval for PCR efficiency or standard error	D
r2 of standard curve	E
Linear dynamic range	E	line 98-104
Cq variation at lower limit	E	Not Applicable
Confidence intervals throughout range	D
Evidence for limit of detection	E	Not Applicable
If multiplex, efficiency and LOD of each assay.	E	Not Applicable
DATA ANALYSIS
qPCR analysis program (source, version)	E	line 98-104
Cq method determination	E	line 98-104
Outlier identification and disposition	E	line 98-104
Results of NTCs	E	line 98-104
Justification of number and choice of reference genes	E	line 98-104
Description of normalisation method	E	line 98-104
Number and concordance of biological replicates	D
Number and stage (RT or qPCR) of technical replicates	E	line 145-149
Repeatability (intra-assay variation)	E	line 145-149
Reproducibility (inter-assay variation, %CV)	D
Power analysis	D
Statistical methods for result significance	E	line 145-149
Software (source, version)	E	line 145-149
Cq or raw data submission using RDML	D
Table 1. MIQE checklist for authors, reviewers and editors. All essential information (E) must be submitted with the manuscript. Desirable
information (D) should be submitted if available. If using primers obtained from RTPrimerDB, information on qPCR target, oligonucleotides,
protocols and validation is available from that source.
*: Assessing the absence of DNA using a no RT assay is essential when first extracting RNA. Once the sample has been validated as
RDNA-free, inclusion of a no-RT control is desirable, but no longer essential.
**: Disclosure of the probe sequence is highly desirable and strongly encouraged. However, since not all commercial pre-designed assay
vendors provide this information, it cannot be an essential requirement. Use of such assays is advised against.
